# Supplementary material
Source: HighWire-hosted journal article supplement (https://cmaj.ca/highwire/filestream/58189/field_highwire_adjunct_files/0/soc-joseph-online_appendix_DC2.pdf)
Supplement: soc-joseph-online_appendix_DC2.pdf [file soc-joseph-online_appendix_DC2.pdf]

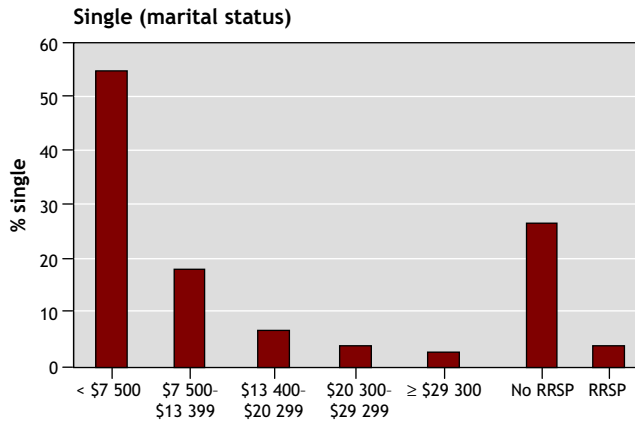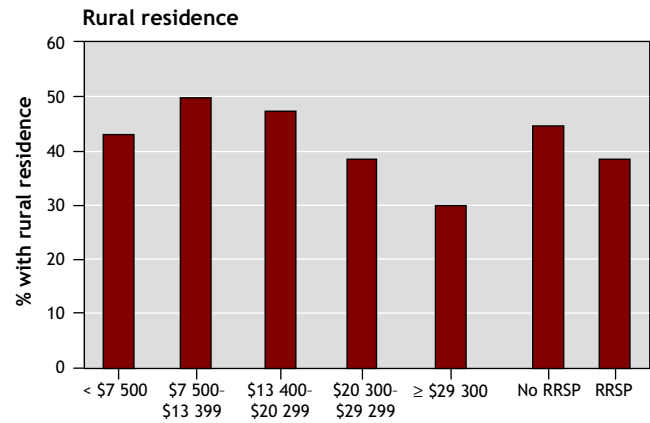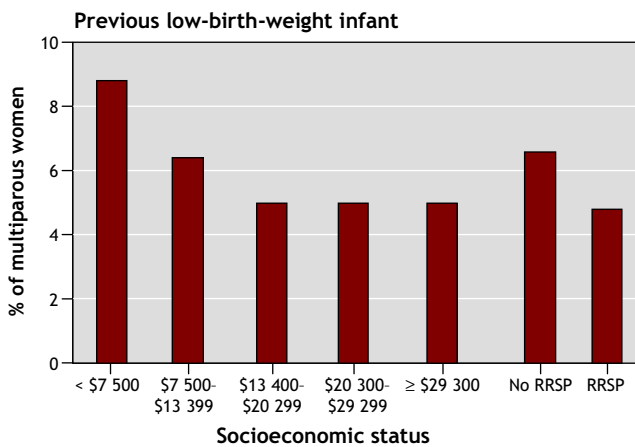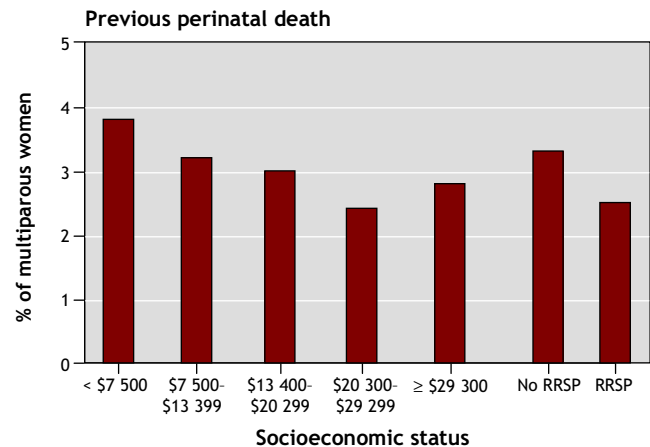

**Appendix 1:** Relation between socioeconomic status (family income and contribution to registered retirement savings plan [RRSP]) and marital status, area of residence, previous low-birth-weight infant and previous perinatal death among women with singleton deliveries in Nova Scotia, 1988–1995. Women in the lower family income groups were more likely than those in the higher income groups to be single, to live in a rural area and to have an unfavourable previous obstetric history.
